# Supplementary material
Source: MDPI journal article supplement (https://www.mdpi.com/2313-4321/6/3/47)
Supplement: s1 [file s1]

## Supplementary Information

# Production of a PET//LDPE Laminate Using a Reversibly Crosslinking Packaging Adhesive and Recycling in a Small-Scale Technical Plant

Katharina M. A. Kaiser <sup>1,2,\*</sup> and Tanja Ginzinger <sup>2</sup>

<sup>1</sup> TUM School of Life Sciences Weihenstephan, Technical University of Munich, Weihenstephaner Steig 22, 85354 Freising, Germany

<sup>2</sup> Fraunhofer Institute for Process Engineering and Packaging IVV, Giggenhauser Strasse 35, 85354 Freising, Germany; tanja.ginzinger@ivv.fraunhofer.de

\* Correspondence: katharina.kaiser.gap@googlemail.com

## Table of Contents

|                        |   |
|------------------------|---|
| Infrared Spectra ..... | 2 |
| DSC Curves .....       | 3 |

## Infrared Spectra

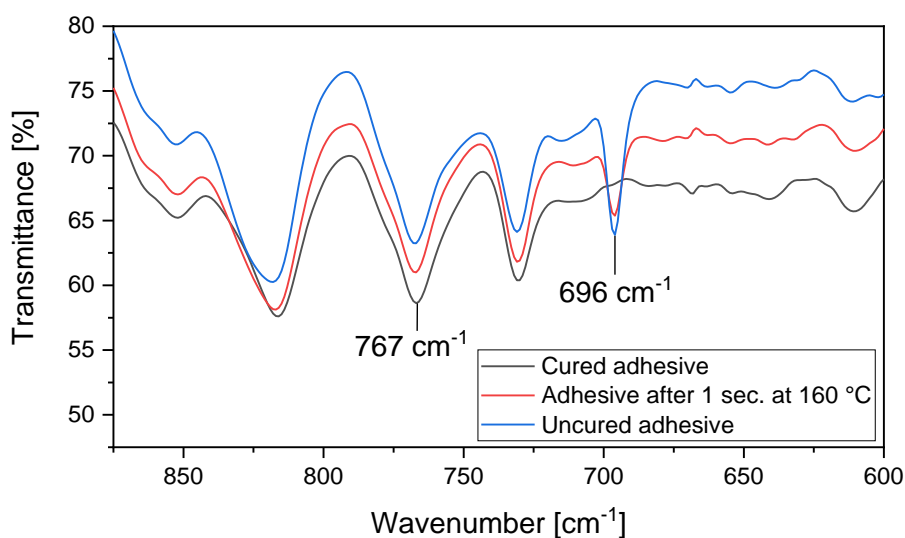

Figure S1. Comparison of the ring deformation band of the maleimide group at 696  $\text{cm}^{-1}$  of the cured adhesive exposed to 160 °C for 1 second and the cured/uncured adhesive.

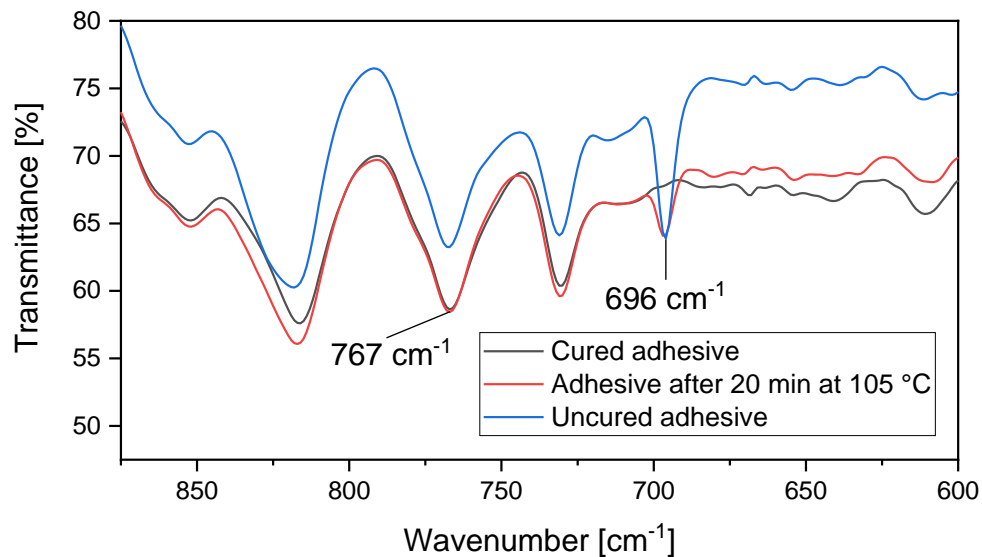

Figure S2. Comparison of the ring deformation band of the maleimide group at 696  $\text{cm}^{-1}$  from the cured adhesive exposed to 105 °C for 20 min and the cured/uncured adhesive.

## DSC Curves

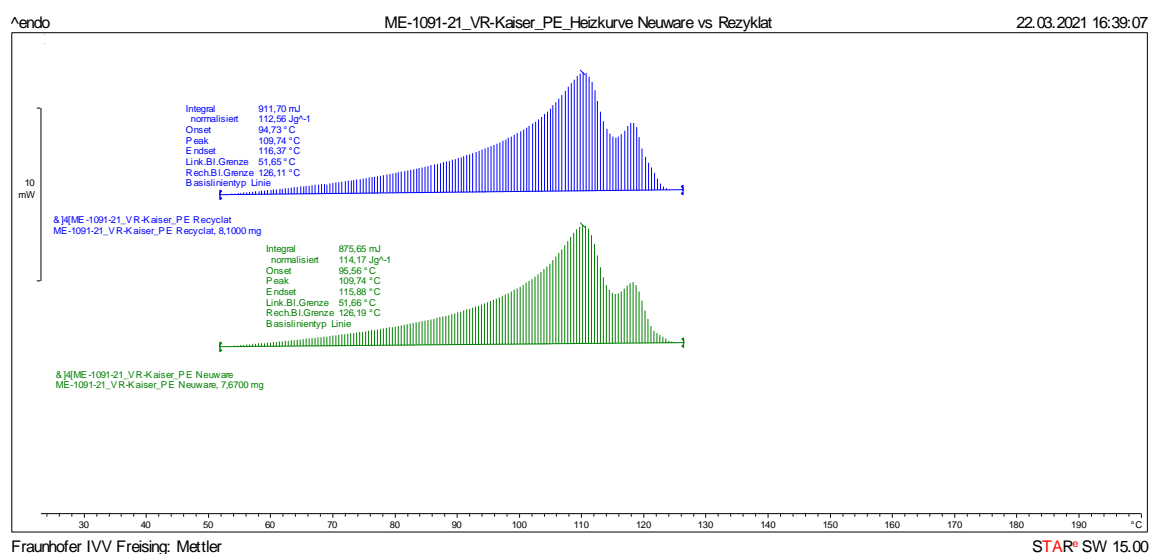

Figure S3. DSC curve of the initial PE film (green) and recycled PE film (blue).

Table S1. Data from DSC evaluation of initial PE film and recycled PE film.

|                           | Initial PE film | Recycled PE film |
|---------------------------|-----------------|------------------|
| Normalized integral       | 114.17 J/g      | 112.56 J/g       |
| Onset                     | 95.56 °C        | 94.73 °C         |
| Peak                      | 109.74 °C       | 109.74 °C        |
| Endset                    | 115.88 °C       | 116.37 °C        |
| Left boundry              | 51.66 °C        | 51.65 °C         |
| Right boundry             | 126.19 °C       | 126.11 °C        |
| Degree of crystallization | 38.97%          | 38.42%           |

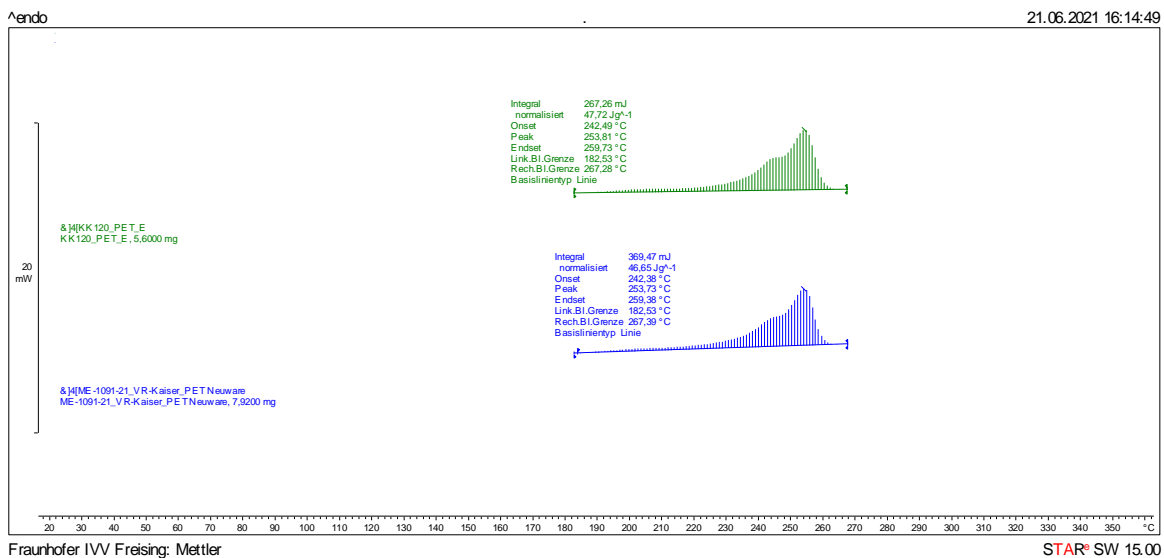

Figure S4. DSC curve of initial PET film (blue) and reganulated PET (green).

Table S2. Data from DSC evaluation of initial PET film and reganulated PET.

|                           | Initial PET film | Recycled PET |
|---------------------------|------------------|--------------|
| Normalized integral       | 46.65 J/g        | 47.72 J/g    |
| Onset                     | 242.38 °C        | 242.49 °C    |
| Peak                      | 253.73 °C        | 253.61 °C    |
| Endset                    | 259.36 °C        | 259.73 °C    |
| Left boundry              | 182.53 °C        | 182.53 °C    |
| Right boundry             | 267.39 °C        | 267.28 °C    |
| Degree of crystallization | 33.32%           | 34.09%       |

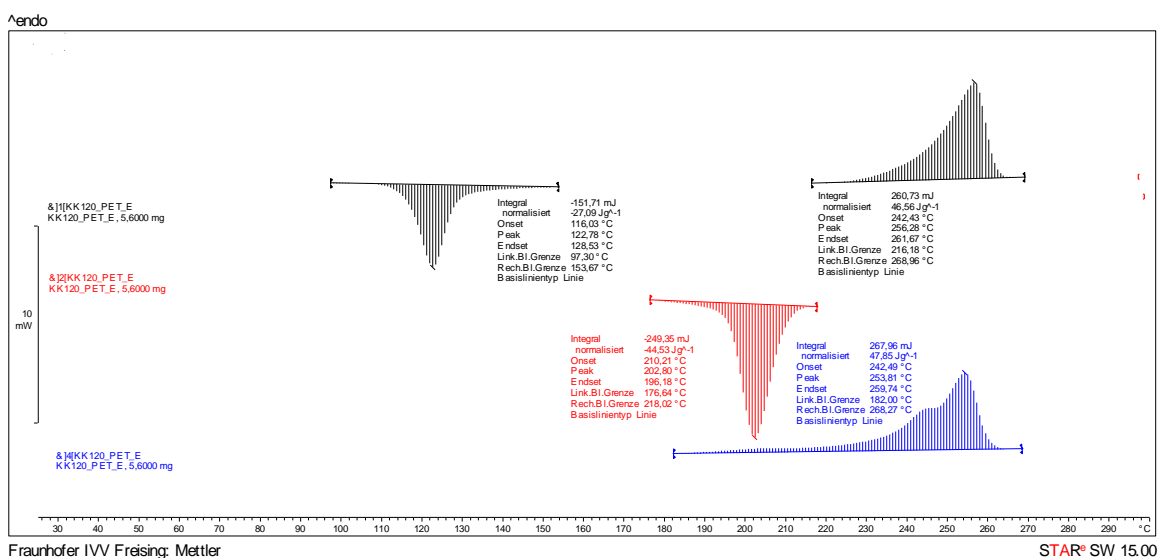

Figure S5. DSC curves of the recycled PET. Shown are the first heating run in black, the cooling curve in red and the second heating run in blue.
